# Supplementary material for: A rare CHD5 haplotype and its interactions with environmental factors predicting hepatocellular carcinoma risk
Source: BMC Cancer. 2018 Jun 15;18:658. doi: 10.1186/s12885-018-4551-y (PMC6003142; doi:10.1186/s12885-018-4551-y)
Supplement: Supplementary file 1 — Table S1. A case-control study in the discovery study with targeted NGS. (XLS 37 kb) [file 12885_2018_4551_MOESM1_ESM.xls]

## Sheet: Asso-Singlemarker-P
Table S1. A case-control study in the discovery study with targeted NGS
#	Name	Assoc Allele	Case,Control Ratio Counts	Case,Control Frequencies	Chi square	PAR
1	rs3827728	C	447:55, 403:51	0.890, 0.888	0.019	0.8915
2	rs3810993	T	356:114, 318:106	0.757, 0.750	0.067	0.7963
3	rs12037962	A	194:366, 164:346	0.346, 0.322	0.741	0.3894
4	rs11587	-	248:248, 216:216	0.500, 0.500	0	1
5	rs41307753	-	0:516, 0:444	0.000, 0.000	NaN	0
6	rs3810989	G	149:411, 126:384	0.266, 0.247	0.505	0.4772
7	rs78008373	-	0:508, 0:450	0.000, 0.000	NaN	0
8	rs3810987	-	0:524, 0:480	0.000, 0.000	NaN	0
9	rs745759	-	257:257, 228:228	0.500, 0.500	0	1
10	rs3888071	-	268:268, 238:238	0.500, 0.500	0	1
11	rs745758	-	0:530, 0:486	0.000, 0.000	NaN	0
12	rs2294931	-	0:542, 0:494	0.000, 0.000	NaN	0
13	rs1883768	A	179:359, 143:347	0.333, 0.292	1.992	0.1581
14	rs12138820	-	0:552, 0:504	0.000, 0.000	NaN	0
15	rs75190060	-	269:269, 246:246	0.500, 0.500	0	1
16	rs12094320	C	303:243, 254:242	0.555, 0.512	1.918	0.1661
17	rs12046716	T	133:415, 119:379	0.243, 0.239	0.02	0.8875
18	rs2281303	A	168:390, 148:360	0.301, 0.291	0.121	0.7281
19	rs74648794	-	0:490, 0:442	0.000, 0.000	NaN	0
20	rs12142108	A	247:297, 225:271	0.454, 0.454	0	0.9893
21	rs12740551	-	252:252, 229:229	0.500, 0.500	0	1
22	rs74989300	-	0:458, 0:408	0.000, 0.000	NaN	0
23	rs67289110	-	0:418, 0:374	0.000, 0.000	NaN	0
24	rs4908515	C	343:217, 299:211	0.613, 0.586	0.765	0.3818
25	rs7518589	-	0:498, 0:438	0.000, 0.000	NaN	0
26	rs1883767	T	283:273, 256:250	0.509, 0.506	0.01	0.9205
27	rs6684349	-	0:462, 0:422	0.000, 0.000	NaN	0
28	rs7531562	-	0:488, 0:446	0.000, 0.000	NaN	0
29	rs6699351	A	479:23, 436:22	0.954, 0.952	0.026	0.871
30	rs72632507	-	0:506, 0:462	0.000, 0.000	NaN	0
31	rs76435043	-	0:490, 0:446	0.000, 0.000	NaN	0
32	rs80028342	-	0:494, 0:446	0.000, 0.000	NaN	0
33	rs2843494	G	139:409, 126:372	0.254, 0.253	0.001	0.9811
34	rs2843493	-	0:514, 0:464	0.000, 0.000	NaN	0
35	rs2273041	C	451:79, 410:72	0.851, 0.851	0	0.9886
36	rs2273040	C	445:81, 404:74	0.846, 0.845	0.001	0.9714
37	rs2273038	C	445:81, 404:74	0.846, 0.845	0.001	0.9714
38	rs55930553	G	448:76, 406:70	0.855, 0.853	0.008	0.928
39	rs12090615	-	0:472, 0:430	0.000, 0.000	NaN	0
40	rs2273037	G	421:71, 383:65	0.856, 0.855	0.001	0.9729
41	rs61749270	-	0:240, 0:218	0.000, 0.000	NaN	0
42	rs72852005	-	0:448, 0:400	0.000, 0.000	NaN	0
43	rs2273036	G	456:44, 414:40	0.912, 0.912	0	0.9954
44	rs59161085	-	0:482, 0:438	0.000, 0.000	NaN	0
45	rs74424450	-	0:494, 0:444	0.000, 0.000	NaN	0
46	rs6662604	T	364:166, 331:151	0.687, 0.687	0	0.9981
47	rs6703624	G	96:432, 85:395	0.182, 0.177	0.038	0.8449
48	rs58006103	-	0:528, 0:478	0.000, 0.000	NaN	0
49	rs6657997	-	0:528, 0:480	0.000, 0.000	NaN	0
50	rs76834507	-	0:526, 0:482	0.000, 0.000	NaN	0
51	rs72632513	A	94:444, 85:405	0.175, 0.173	0.003	0.9578
52	rs2273034	G	447:91, 405:83	0.831, 0.830	0.002	0.9681
53	rs2273033	C	396:130, 359:119	0.753, 0.751	0.004	0.9472
54	rs1883766	A	152:346, 138:316	0.305, 0.304	0.002	0.9665
55	rs12754299	A	101:443, 91:405	0.186, 0.183	0.008	0.9274
56	rs9434662	T	369:187, 335:171	0.664, 0.662	0.003	0.9557
57	rs17029184	T	164:364, 149:331	0.311, 0.310	0	0.9948
58	rs79319708	-	0:508, 0:462	0.000, 0.000	NaN	0
59	rs1883764	C	460:84, 416:76	0.846, 0.846	0	0.9979
60	rs17029186	-	0:514, 0:468	0.000, 0.000	NaN	0
61	rs77294792	-	0:508, 0:462	0.000, 0.000	NaN	0
62	rs2235790	G	361:159, 327:147	0.694, 0.690	0.022	0.8818
63	rs11121295	G	229:331, 202:308	0.409, 0.396	0.183	0.6686
64	rs9435067	C	366:130, 333:119	0.738, 0.737	0.002	0.9672
65	rs11121299	T	383:151, 347:137	0.717, 0.717	0	0.9919
66	rs3765452	T	153:351, 138:320	0.304, 0.301	0.006	0.9392
67	rs72852024	-	0:500, 0:454	0.000, 0.000	NaN	0
68	rs75773968	-	0:470, 0:426	0.000, 0.000	NaN	0
69	rs3765451	T	356:186, 323:171	0.657, 0.654	0.01	0.9197
70	rs77936350	-	0:472, 0:428	0.000, 0.000	NaN	0
71	rs2746067	C	109:379, 89:355	0.223, 0.200	0.729	0.3931
72	rs80227949	-	0:488, 0:442	0.000, 0.000	NaN	0
73	rs58363298	-	0:484, 0:440	0.000, 0.000	NaN	0
74	rs2250504	G	101:407, 90:372	0.199, 0.195	0.025	0.8752
75	rs79043205	-	0:470, 0:428	0.000, 0.000	NaN	0
76	rs72632517	-	0:470, 0:426	0.000, 0.000	NaN	0
77	rs76969190	-	0:472, 0:426	0.000, 0.000	NaN	0
78	rs9435079	C	109:391, 99:357	0.218, 0.217	0.001	0.9733
79	rs9435080	G	470:84, 425:77	0.848, 0.847	0.006	0.9366
80	rs72632523	G	411:75, 372:68	0.846, 0.845	0	0.9925
81	rs7526887	A	96:380, 87:349	0.202, 0.200	0.006	0.9358
82	rs7513548	G	126:408, 110:376	0.236, 0.226	0.132	0.716
83	rs2250358	C	459:91, 417:83	0.835, 0.834	0.001	0.9811
84	rs2746066	A	94:390, 84:356	0.194, 0.191	0.016	0.8987
85	rs2785582	A	360:82, 327:75	0.814, 0.813	0.002	0.9689
86	rs17436753	G	359:79, 327:73	0.820, 0.818	0.006	0.9362
87	rs2785585	T	225:335, 194:316	0.402, 0.380	0.513	0.4739
88	rs58622978	-	0:410, 0:372	0.000, 0.000	NaN	0
89	rs2485024	G	434:104, 393:97	0.807, 0.802	0.035	0.851
90	rs7526032	-	0:472, 0:426	0.000, 0.000	NaN	0
91	rs7529286	G	410:66, 372:60	0.861, 0.861	0	0.9919
92	rs77982107	-	0:470, 0:428	0.000, 0.000	NaN	0
93	rs2273032	T	249:285, 188:300	0.466, 0.385	6.843	0.0089
94	rs41307755	-	0:528, 0:480	0.000, 0.000	NaN	0
95	rs76460950	-	0:482, 0:438	0.000, 0.000	NaN	0
96	rs754248	G	280:214, 253:197	0.567, 0.562	0.02	0.8873
97	rs78645166	-	0:498, 0:448	0.000, 0.000	NaN	0
98	rs17436816	A	20:526, 18:480	0.037, 0.036	0.002	0.9666
99	rs17489787	G	119:441, 100:410	0.212, 0.196	0.442	0.5061
100	rs9435102	A	52:490, 47:445	0.096, 0.096	0.001	0.982
101	rs78898494	-	0:528, 0:480	0.000, 0.000	NaN	0
102	rs12067480	T	209:297, 158:302	0.413, 0.343	4.95	0.0261
103	rs12734251	A	307:187, 278:170	0.621, 0.621	0.001	0.9768
104	rs2294715	C	205:279, 185:253	0.424, 0.422	0.001	0.9711
105	rs77123723	-	0:514, 0:464	0.000, 0.000	NaN	0
106	rs41279488	-	0:504, 0:456	0.000, 0.000	NaN	0
107	rs61740827	-	0:502, 0:454	0.000, 0.000	NaN	0
108	rs12066146	-	0:472, 0:424	0.000, 0.000	NaN	0
109	rs1883606	G	338:222, 290:220	0.604, 0.569	1.344	0.2463
110	rs12129474	T	162:322, 147:293	0.335, 0.334	0	0.9841
111	rs41279496	T	127:379, 115:345	0.251, 0.250	0.001	0.9718
112	rs12565328	T	141:393, 127:359	0.264, 0.261	0.01	0.9212
113	rs41278914	-	0:472, 0:426	0.000, 0.000	NaN	0
114	rs11804734	C	194:292, 174:266	0.399, 0.395	0.013	0.908
115	rs12564469	A	336:146, 285:149	0.697, 0.657	1.708	0.1912
116	rs9434711	A	328:166, 292:152	0.664, 0.658	0.042	0.8385
117	rs6700735	-	0:470, 0:444	0.000, 0.000	NaN	0
118	rs9435113	T	158:324, 143:295	0.328, 0.326	0.002	0.9661
119	rs10864393	G	283:277, 231:279	0.505, 0.453	2.938	0.0865
120	rs10864394	A	158:322, 144:294	0.329, 0.329	0	0.9897
121	rs1883605	-	0:472, 0:426	0.000, 0.000	NaN	0
122	rs746122	-	0:440, 0:406	0.000, 0.000	NaN	0
123	rs72852056	-	0:414, 0:376	0.000, 0.000	NaN	0
124	rs2311388	G	400:134, 363:123	0.749, 0.747	0.006	0.937
125	rs1883603	-	0:190, 0:178	0.000, 0.000	NaN	0
126	rs6679857	G	55:391, 50:356	0.123, 0.123	0	0.9941
127	rs11582074	-	0:326, 0:288	0.000, 0.000	NaN	0
128	rs12075931	-	0:348, 0:308	0.000, 0.000	NaN	0
129	rs9434722	A	55:395, 49:361	0.122, 0.120	0.015	0.9031
130	rs12034457	A	343:109, 313:101	0.759, 0.756	0.009	0.9232
131	rs12035285	T	346:108, 315:101	0.762, 0.757	0.029	0.8657
132	rs12035382	T	342:110, 312:102	0.757, 0.754	0.011	0.9179
133	rs77219692	C	344:112, 312:102	0.754, 0.754	0.001	0.9792
134	rs12074369	C	515:5, 469:5	0.990, 0.989	0.022	0.8829
135	rs72632556	-	0:514, 0:468	0.000, 0.000	NaN	0
136	rs9434741	A	451:109, 374:136	0.805, 0.733	7.843	0.0051
137	rs11121357	-	0:498, 0:454	0.000, 0.000	NaN	0
138	rs3827727	A	58:454, 52:414	0.113, 0.112	0.007	0.9333
139	rs61759472	-	0:428, 0:392	0.000, 0.000	NaN	0
140	rs747393	T	137:389, 125:355	0.260, 0.260	0	0.9989
141	rs731975	T	284:276, 256:254	0.507, 0.502	0.029	0.8655
142	rs4908529	C	295:265, 267:243	0.527, 0.524	0.011	0.9152
143	rs78559102	-	0:396, 0:354	0.000, 0.000	NaN	0
144	rs77010307	-	0:490, 0:442	0.000, 0.000	NaN	0
145	rs12085811	A	59:453, 52:414	0.115, 0.112	0.032	0.8575
146	rs76044468	-	0:424, 0:396	0.000, 0.000	NaN	0
147	rs58385986	C	91:385, 81:353	0.191, 0.187	0.031	0.8613
148	rs11808801	C	81:323, 72:306	0.200, 0.190	0.125	0.7241
149	rs60925969	G	77:315, 71:303	0.196, 0.190	0.053	0.8174
150	rs12138670	A	77:315, 71:299	0.196, 0.192	0.025	0.8743
151	rs76614095	-	0:490, 0:442	0.000, 0.000	NaN	0
152	rs76723054	-	0:406, 0:362	0.000, 0.000	NaN	0
153	rs11121407	A	451:79, 409:73	0.851, 0.849	0.011	0.9152
154	rs4908861	-	0:396, 0:360	0.000, 0.000	NaN	0
155	rs34109094	-	0:384, 0:350	0.000, 0.000	NaN	0
156	rs56981723	C	78:318, 71:305	0.197, 0.189	0.082	0.7745
157	rs35910912	-	0:396, 0:376	0.000, 0.000	NaN	0
158	rs57677893	T	77:315, 71:301	0.196, 0.191	0.038	0.8457
159	rs7542655	C	507:53, 456:54	0.905, 0.894	0.375	0.5405
160	rs1534997	C	79:481, 54:456	0.141, 0.106	3.036	0.0814
161	rs12143847	-	0:436, 0:394	0.000, 0.000	NaN	0
162	rs2038153	-	0:438, 0:396	0.000, 0.000	NaN	0
163	rs10260	T	405:71, 367:67	0.851, 0.846	0.048	0.8265
164	rs60086377	G	74:400, 66:366	0.156, 0.153	0.019	0.8895
